# Supplementary material for: WOx/ZrOx functionalised periodic mesoporous organosilicas as water-tolerant catalysts for carboxylic acid esterification
Source: Royal Society of Chemistry journal article supplement (doi:10.1039/d2se01724e), 2023-01-01
Supplement: d2se01724e1.pdf [file d2se01724e1.pdf]

## Supporting information

### WO<sub>x</sub>/ZrO<sub>x</sub> functionalised periodic mesoporous organosilicas as water-tolerant catalysts for carboxylic acid esterification

Vannia C. dos Santos-Durndell,<sup>a+</sup> Lee J. Durndell,<sup>a+\*</sup> Mark A. Isaacs,<sup>b,c</sup> Adam F. Lee<sup>d\*</sup> and Karen Wilson<sup>d\*</sup>

<sup>a</sup>School of Geography, Earth and Environmental Sciences, Plymouth University, Plymouth, PL4 8AA, UK.

<sup>b</sup>Department of Chemistry, University College London, London, WC1E 6BT, UK.

<sup>c</sup>HarwellXPS, Research Complex at Harwell, Rutherford Appleton Laboratory, Didcot, Oxfordshire, OX11 0DE, UK.

<sup>d</sup>Centre for Advanced Materials and Industrial Chemistry (CAMIC), RMIT University, Melbourne VIC 3000, Australia.

[<sup>+</sup>] *These authors contributed equally to this work*

Corresponding authors: lee.durndell@plymouth.ac.uk; adamfraserlee@gmail.com; and karen.wilson2@rmit.edu.au

## Experimental

### Support synthesis

SBA-15 and PMO analogues containing phenyl bridged siloxane units derived from BTSB (1,4-bis(triethoxysilyl)benzene) were prepared adapting the protocol of Sánchez-Vázquez et al.<sup>1</sup> Briefly, 3 g Pluronic P123 triblock copolymer was dissolved in 96 cm<sup>3</sup> water and 1 cm<sup>3</sup> HCl under stirring for 24 h at 40 °C. The appropriate ratio of TEOS and BTSB precursors (to vary the proportion of Si atoms derived from TEOS versus BTSB to be between 25% and 100%) were subsequently added to the surfactant solution, which was stirred at 40 °C for a further 72 h. The mixture was then aged at 130 °C for 24 h and the resulting solid product filtered, washed three times with deionised water and dried at room temperature. Residual P123 template was extracted via two cycles of a 24 h reflux with EtOH/1 M HCl solution, then filtered and dried yielding the final powdered SBA-15 and PMO silica supports. PMO(25%) corresponds to a TEOS:BTSB molar ratio of 6:1; PMO(50%) corresponds to a molar ratio of 2:1, and PMO(100%) corresponds to no TEOS and only BTSB added. Note the overall Si/P123 molar ratio was constant in all cases at 60:1.

### Tungsten and zirconia incorporation

Tungsten and zirconia were incorporated onto the PMO following a co-grafting method using tungsten chloride and zirconium propoxide as precursors adapting the protocols of Morales et al.<sup>2</sup> and dos Santos et al.<sup>3</sup> Briefly 3 g PMO was dried at 100 °C for 4 h and added to 17.54 g of 70 vol% zirconium(IV) isopropoxide in propan-1-ol, 1.01 g WCl<sub>6</sub> (in 20 mL ethanol) and 60 mL anhydrous hexane. The mixture was refluxed at 69 °C overnight, and then filtered and washed with hexane to remove any unreacted precursor. The resulting solid was rehydrated with 60 mL deionised H<sub>2</sub>O at room temperature under stirring for 4 h, filtered, washed with deionised H<sub>2</sub>O and ethanol and dried at 100 °C overnight to yield the final WO<sub>x</sub>/ZrO<sub>x</sub>/PMO material.

### Support and catalyst characterisation

Wide angle XRD patterns were recorded on a Bruker D8 Advance diffractometer with a Cu K<sub>α</sub> (1.54 Å) source calibrated against a Si standard, between 2θ = 20-90 °, with a step size of 0.02°. Low angle XRD patterns were recorded for 2θ = 0.2-8.0 ° with a step size of 0.02 °. Nitrogen porosimetry was undertaken on a Quantachrome Nova 2000e porosimeter using NovaWin version 11 analysis software. Samples were degassed at 120 °C for 2 h before nitrogen physisorption. Adsorption/desorption isotherms were recorded for parent and impregnated silicas, with BET surface areas calculated over the relative pressure range 0.01-0.2. Pore diameters and volumes were calculated by applying the NLDFT method to desorption isotherms for relative pressures >0.35. Bulk tungsten and zirconium loadings were calculated using XRF analysis on a Bruker S8. DRIFTS measurements were conducted using a Thermo Scientific Nicolet environmental cell and smart collector accessory on a Thermo Scientific Nicolet iS50 FT-IR Spectrometer with MCT detector. Ex-situ pyridine adsorption studies were made by wetting the samples with pyridine. Excess pyridine was removed overnight in vacuo at 80 °C, with subsequent *in vacuo* analysis by DRIFTS. Acid site loadings were measured by NH<sub>3</sub> pulse chemisorption using a Quantachrome ChemBET 3000 instrument interfaced to an MKS Minilab mass spectrometer (MS). Samples were degassed at 120 °C overnight under helium, before NH<sub>3</sub> pulse titration at 100 °C. Acid strength

was examined by propylamine adsorption and subsequent TGA-mass spectrometry (MS) analysis. Catalysts were wetted with propylamine, with excess physisorbed propylamine removed in vacuo at room temperature prior to temperature programmed desorption on a Mettler Toledo TGA/DSC 2 STARe System equipped with a Pfeiffer Vacuum ThermoStar™ GSD 301 T3 mass spectrometer. Evolution of reactively-formed propene ( $m/z=41$  amu) evidenced acid catalysed propylamine decomposition (by the Hofmann rearrangement), with lower temperature desorption indicative of stronger acid sites. Carbon content was verified using CHNS analysis via a Thermo Scientific Flash 2000 CHNS-O analyser. XPS was performed on a Kratos Axis HSi X-ray photoelectron spectrometer fitted with a charge neutraliser and magnetic focusing lens employing Al  $K_{\alpha}$  monochromated radiation (1486.7 eV). Spectral fitting was performed using CasaXPS version 2.3.14, with binding energies corrected to the C 1s peak at 284.6 eV. W 4f and Zr 4p XP spectra were fitted using an asymmetric lineshape. High-resolution high-angle annular dark-field STEM images were obtained on an aberration-corrected JEOL 2100-F microscope operated at 200 kV, with image analysis using ImageJ v1.41 software. Samples were dispersed in methanol and drop cast on 200-mesh carbon-coated copper grids and dried under ambient conditions. Solid-state NMR spectra were obtained at the EPSRC UK National Solid-state NMR Service at Durham University. Silicon nuclei environments were characterized by single pulse solid state  $^{29}\text{Si}$  magic-angle spinning (MAS)-NMR experiments at a magnetic field strength of 11.7 T on a high-resolution Bruker Avance III HD NMR spectrometer at room temperature operating, at a frequency of 79.435 MHz. Resultant spectra were recorded using a  $4.0 \mu\text{s}$   $\pi/2$  pulse, a recycle delay of 30s, and 1000 transients. Proton nuclei environments were recorded under similar conditions at a frequency of approx. 400.17 MHz.

### Catalytic reactions

Batch esterification reactions were performed using a Radleys Carousel reactor station at atmospheric pressure. 300 mmol methanol, 10 mmol propanoic ( $\text{C}_3$ ), levulinic ( $\text{C}_5$ ), hexanoic ( $\text{C}_6$ ), octanoic ( $\text{C}_8$ ) decanoic acid ( $\text{C}_{10}$ ) or palmitic ( $\text{C}_{16}$ ) acid; and 0.5 mmol dihexyl ether (as an internal standard) were added to a sealed glass reactor, containing 0.025 g catalyst, at 60 °C, stirring at 800 rpm. Aliquots were withdrawn periodically from the reaction mixture and analysed by off-line GC after dilution with methanol using a Shimadzu GC-2010 Plus system with an FID and BP50 30 m x 0.32 mm x 0.25  $\mu\text{m}$  capillary column.

GC injections were performed in triplicate, with average values reported. Conversion was calculated from **Equation S1**, where  $n_t$  is the number of mmol reactant at time  $t$ , and  $n_0$  the initial mmol acid. Errors in acid conversion were  $\pm 3\%$ . Turnover Frequencies (TOFs) were calculated by normalisation of initial rates derived from the linear portion of reaction profiles (during the first hour) to the acid site loadings obtained from  $\text{NH}_3$  pulse chemisorption. Water addition experiments were performed with addition of 5 mmol deionised water.

$$\% \text{ Conversion} = [(n_0 - n_t) / (n_0)] \times 100 \quad \text{Equation S1}$$

$$\text{TOF} = \text{mmol}_{\text{acid}} \text{ converted} \cdot \text{h}^{-1} / \text{mmol}_{\text{surfaceacid sites}} \quad \text{Equation S2}$$

## Support and catalyst characterisation

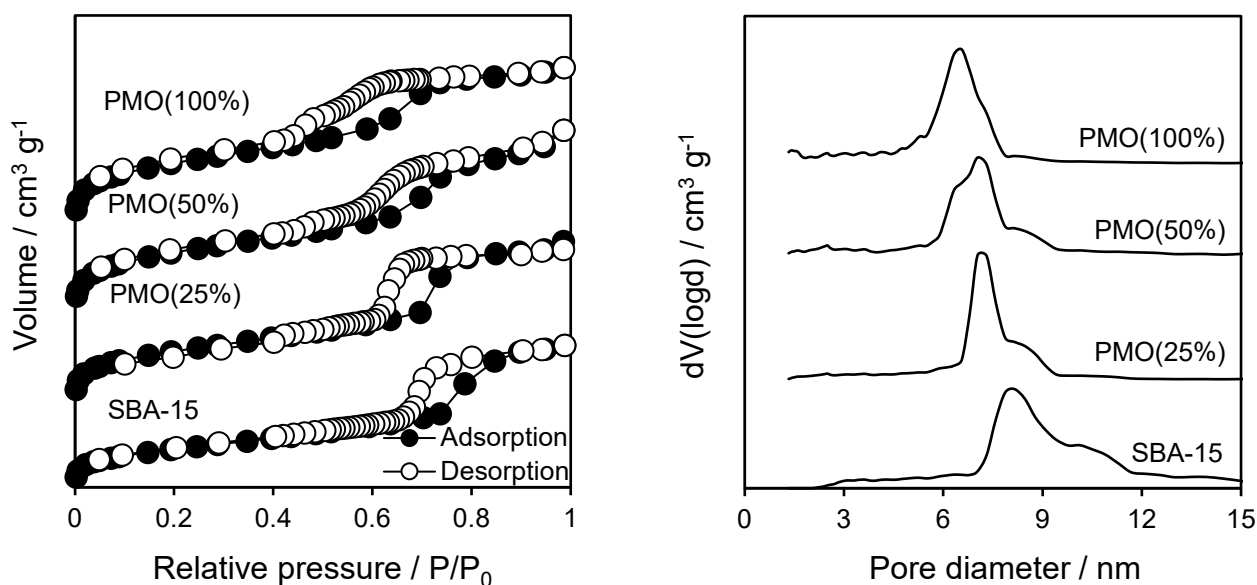

**Figure S1.** (left)  $N_2$  adsorption-desorption isotherms, and (right) NLDFT pore size distributions of the parent SBA-15 and PMOs. Offset for clarity.

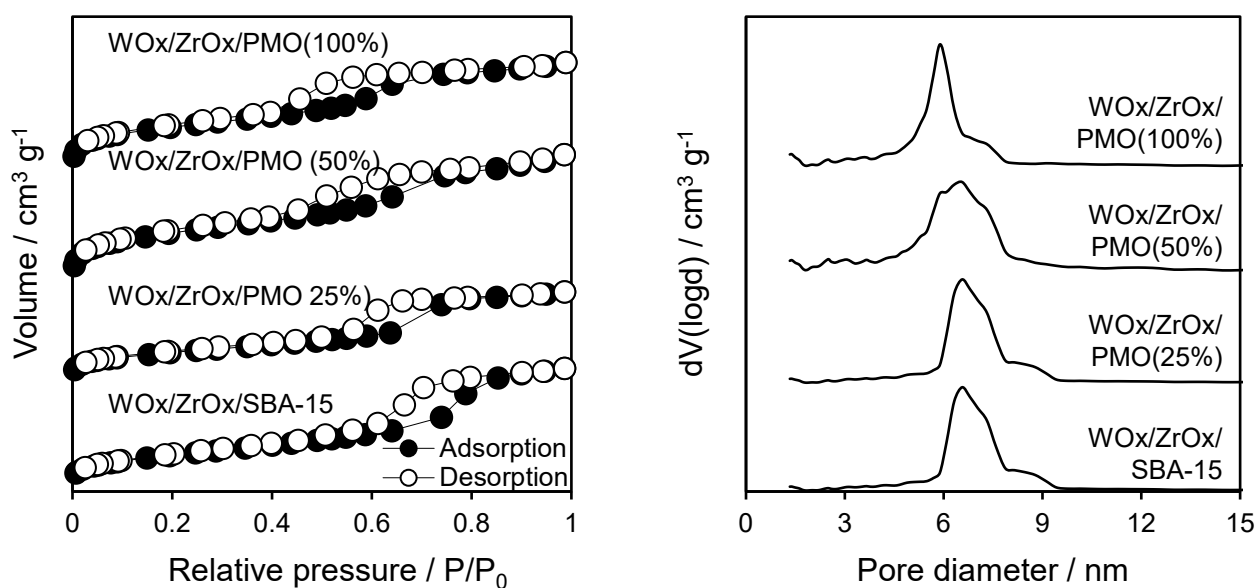

**Figure S2.** (left)  $N_2$  adsorption-desorption isotherms, and (right) NLDFT pore size distributions of  $WO_x/ZrO_x$  impregnated SBA-15 and PMOs. Offset for clarity.

**Table S1.** Comparison of support pore diameters determined by porosimetry and microscopy.

| Support   | NLDFT pore diameter / nm | HRTEM pore diameter / nm |
|-----------|--------------------------|--------------------------|
| SBA-15    | 8.2                      | $6.6 \pm 0.34$           |
| PMO(25%)  | 7.0                      | $5.7 \pm 0.49$           |
| PMO(50%)  | 6.8                      | $5.3 \pm 0.50$           |
| PMO(100%) | 6.6                      | $4.7 \pm 0.46$           |

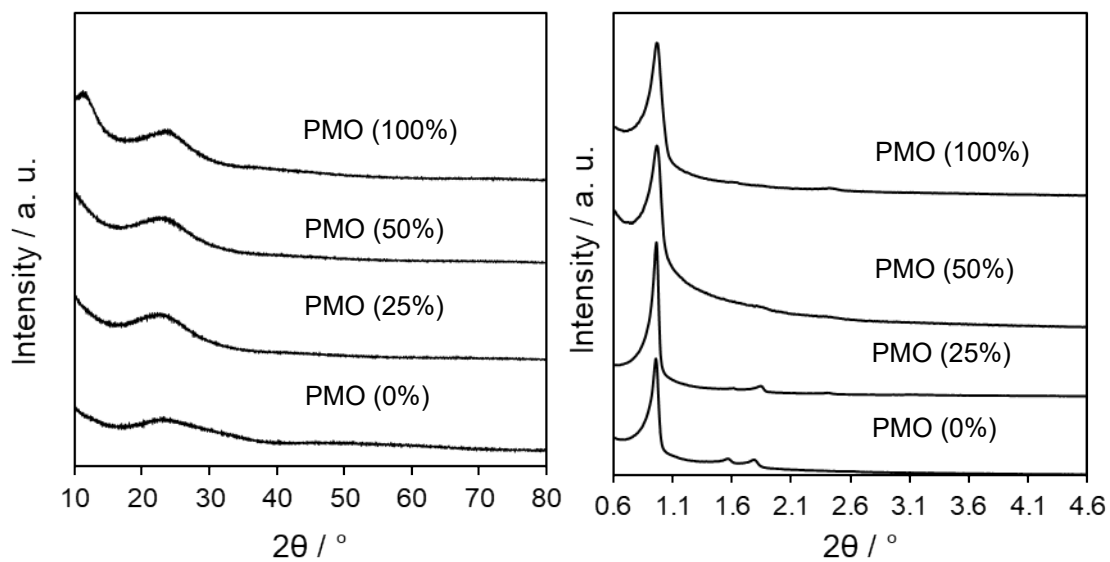

**Figure S3.** (*left*) Wide angle and (*right*) low angle XRD patterns of the parent SBA-15 and PMOs. Offset for clarity.

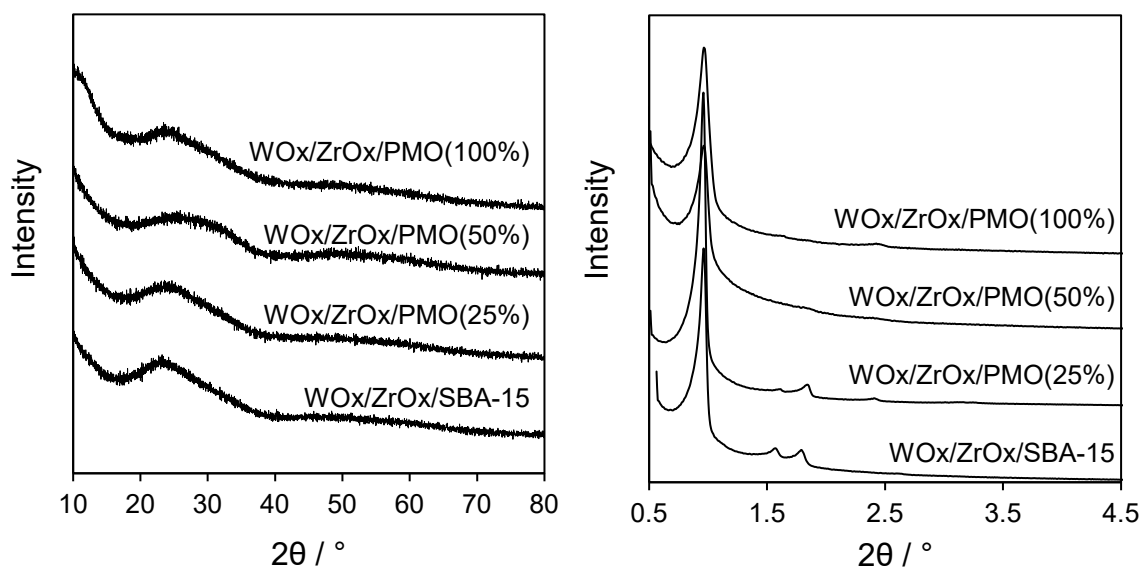

**Figure S4.** (*left*) Wide angle and (*right*) low angle XRD patterns of the  $\text{WO}_x/\text{ZrO}_x$  impregnated periodic mesoporous organosilica supports. Offset for clarity.

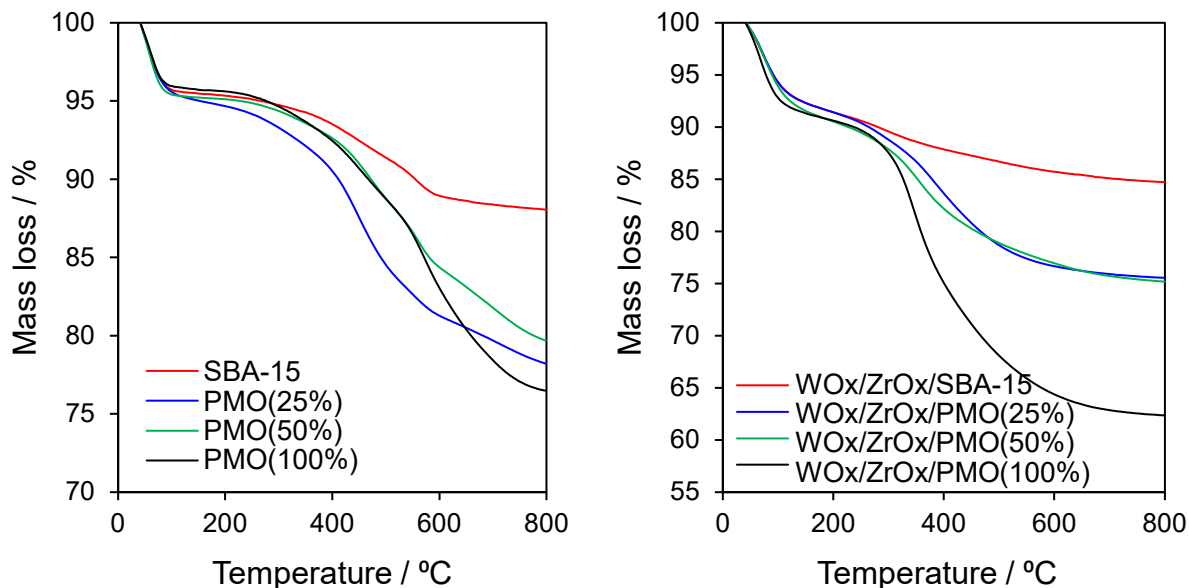

**Figure S5.** Thermogravimetric analysis (TGA) of (*left*) parent SBA-15 and PMOs, and (*right*) WO<sub>x</sub>/ZrO<sub>x</sub> impregnated SBA-15 and PMOs.

**Table S2.** Chemical analysis of WO<sub>x</sub>/ZrO<sub>x</sub> impregnated SBA-15 and PMOs.

| Sample                                       | Bulk Cl <sup>a</sup><br>/ wt% | Bulk W <sup>a</sup><br>/ wt% | Surface W <sup>b</sup><br>/ wt% | Bulk Zr <sup>a</sup><br>/ wt% | Surface Zr <sup>b</sup><br>/ wt% | Bulk W:Zr<br>mass ratio <sup>a</sup> | Surface W:Zr<br>mass ratio <sup>b</sup> | H <sup>+</sup> <sup>c</sup><br>/ mmol.g <sup>-1</sup> |
|----------------------------------------------|-------------------------------|------------------------------|---------------------------------|-------------------------------|----------------------------------|--------------------------------------|-----------------------------------------|-------------------------------------------------------|
| WO <sub>x</sub> /ZrO <sub>x</sub> /SBA-15    | -                             | 2.0                          | 2.0                             | 27.9                          | 26.2                             | 0.07                                 | 0.08                                    | 1.05                                                  |
| WO <sub>x</sub> /ZrO <sub>x</sub> /PMO(25%)  | -                             | 1.6                          | 1.7                             | 21.9                          | 20.0                             | 0.07                                 | 0.08                                    | 0.68                                                  |
| WO <sub>x</sub> /ZrO <sub>x</sub> /PMO(50%)  | -                             | 1.8                          | 1.6                             | 23.2                          | 19.4                             | 0.08                                 | 0.08                                    | 0.63                                                  |
| WO <sub>x</sub> /ZrO <sub>x</sub> /PMO(100%) | -                             | 1.8                          | 1.8                             | 26.0                          | 29.2                             | 0.07                                 | 0.06                                    | 0.5                                                   |

<sup>a</sup>ICP-MS. <sup>b</sup>XPS. <sup>c</sup>Propylamine TPD.

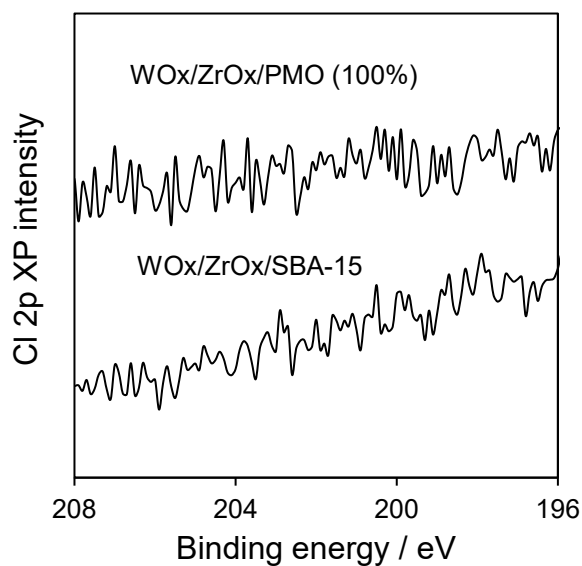

**Figure S6.** High-resolution Cl 2p XP spectra on WO<sub>x</sub>/ZrO<sub>x</sub> impregnated SBA-15 and PMO(100%) confirming the absence of surface chlorine. Offset for clarity.

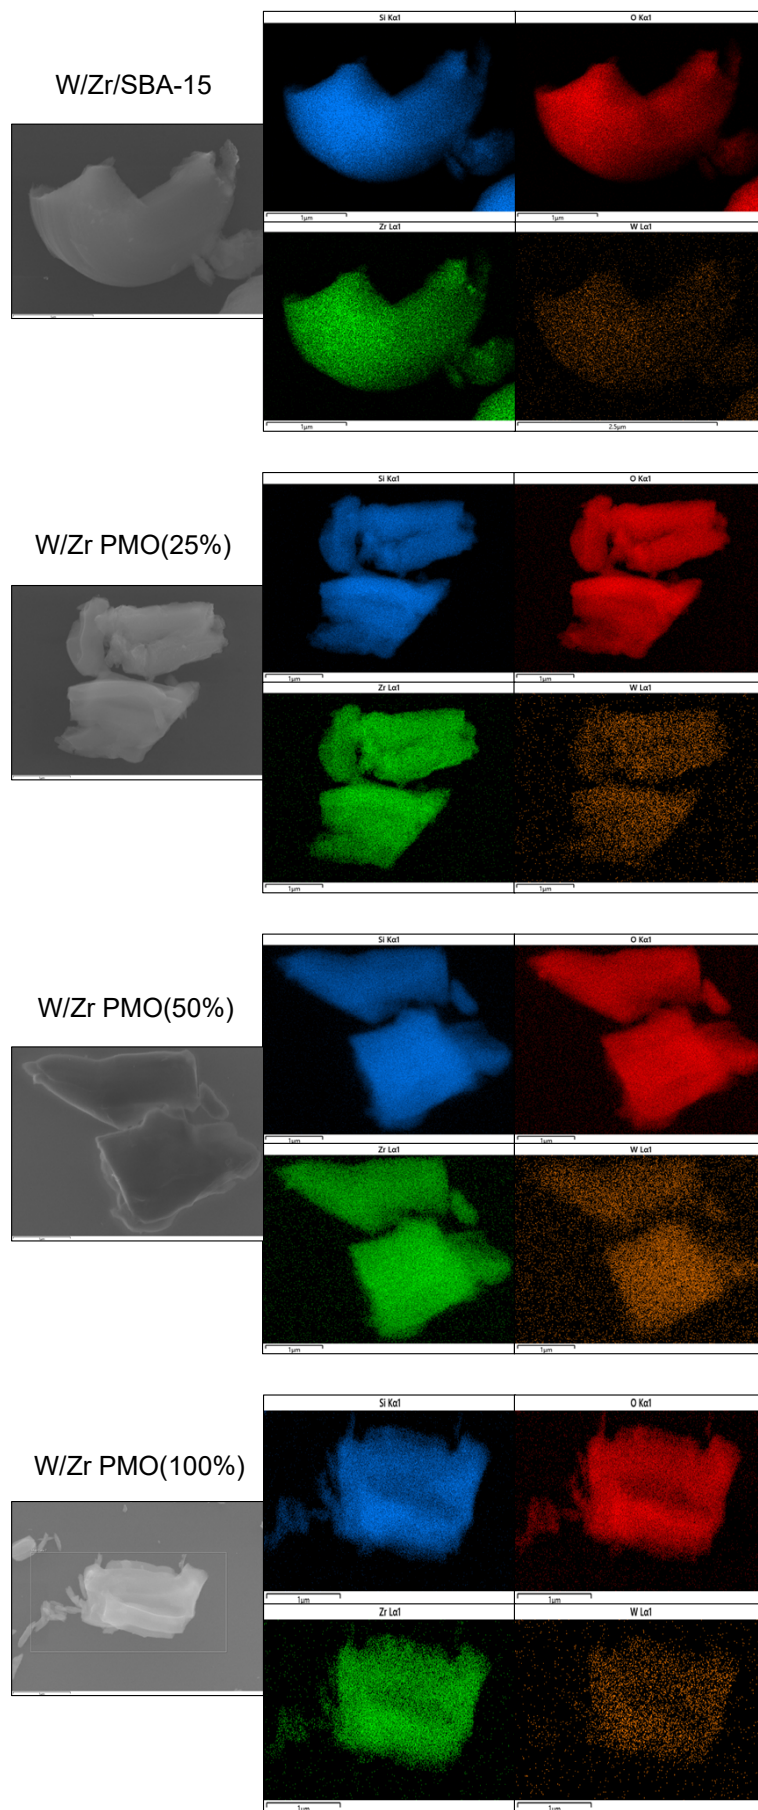

**Figure S7.** SEM images and corresponding EDX elemental maps (Si - blue; O - red; Zr - green; W - orange) of WO<sub>x</sub>/ZrO<sub>x</sub> impregnated SBA-15 and PMOs.

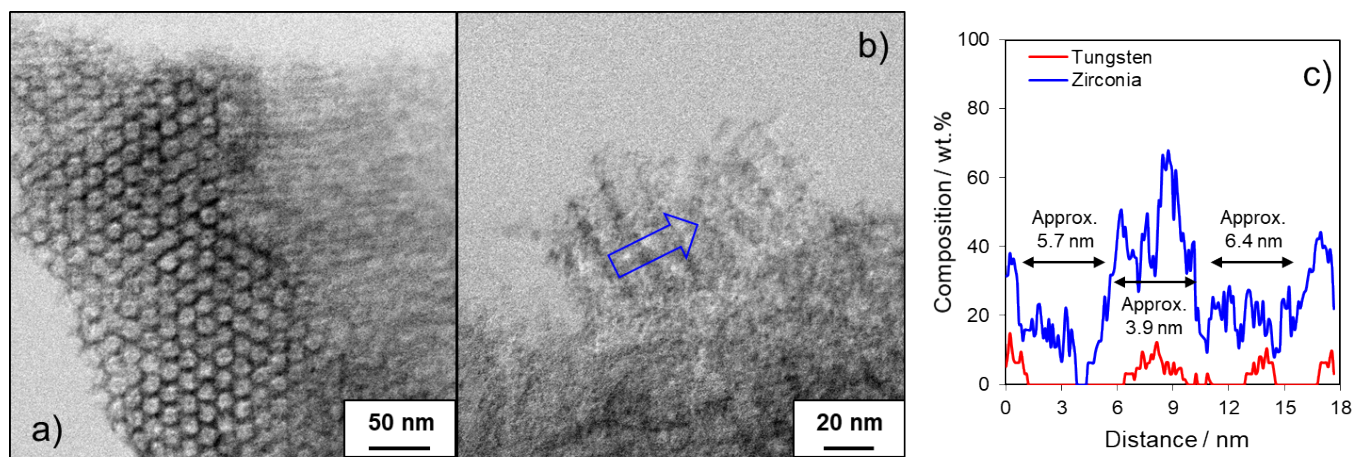

**Figure S8.** Representative HRTEM bright field images of  $\text{WO}_x/\text{ZrO}_x/\text{SBA-15}$ , a) and b); and c) representative elemental line scans confirming the successful co-impregnation of W and Zr species into the support mesopore network.

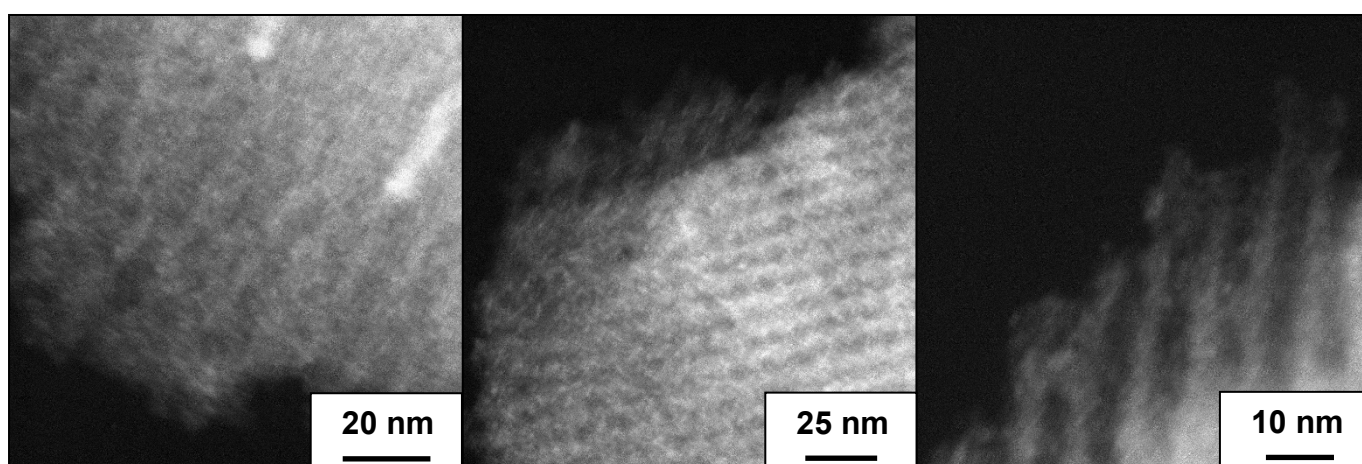

**Figure S9.** Representative HRTEM dark field images of  $\text{WO}_x/\text{ZrO}_x/\text{PMO}(25\%)$ .

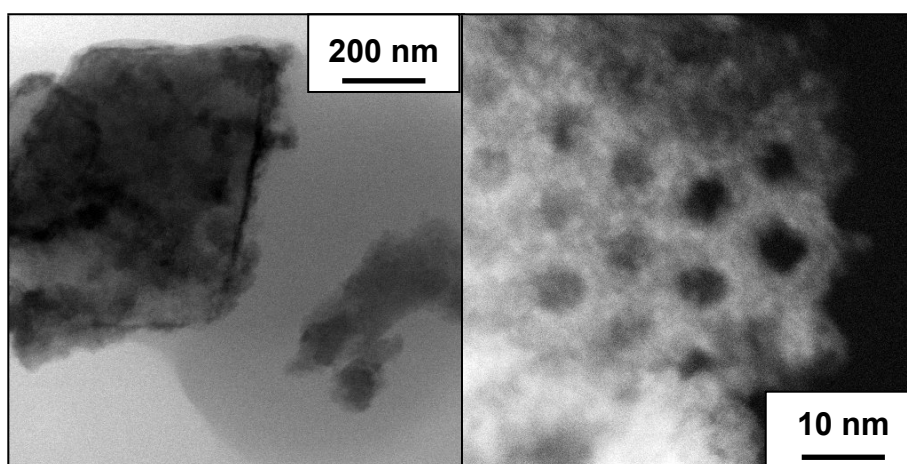

**Figure S10.** Representative HRTEM dark and bright field images of  $\text{WO}_x/\text{ZrO}_x/\text{PMO}(50\%)$ .

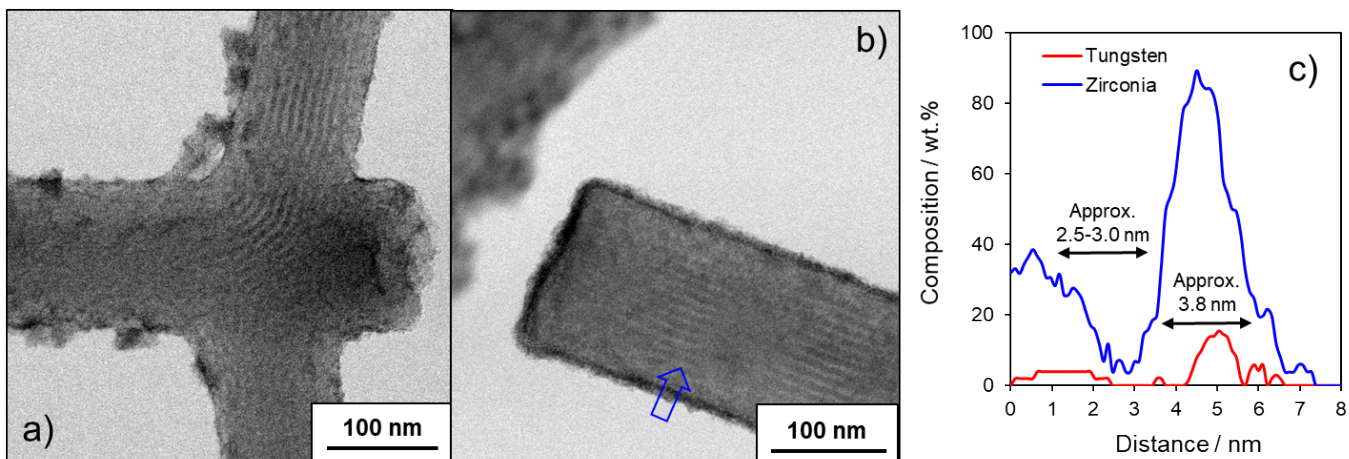

**Figure S11.** Representative HRTEM bright field images of  $\text{WO}_x/\text{ZrO}_x/\text{PMO}$  (100%), a) and b); and c) representative elemental line scans confirming the successful co-impregnation of W and Zr species into the support mesopore network.

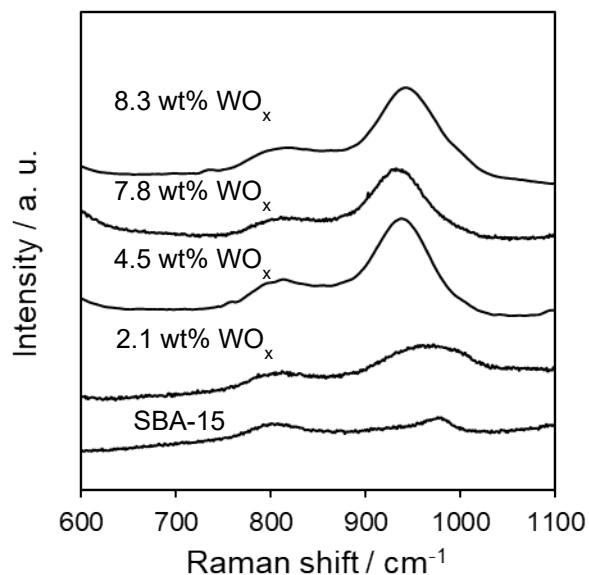

**Figure S12.** Loading dependant reference Raman spectra, evidencing the evolution of the  $\text{WO}_x$  Raman band at  $\sim 950 \text{ cm}^{-1}$  for  $\text{WO}_x/\text{ZrO}_x/\text{SBA-15}$  (for indexing purposes).



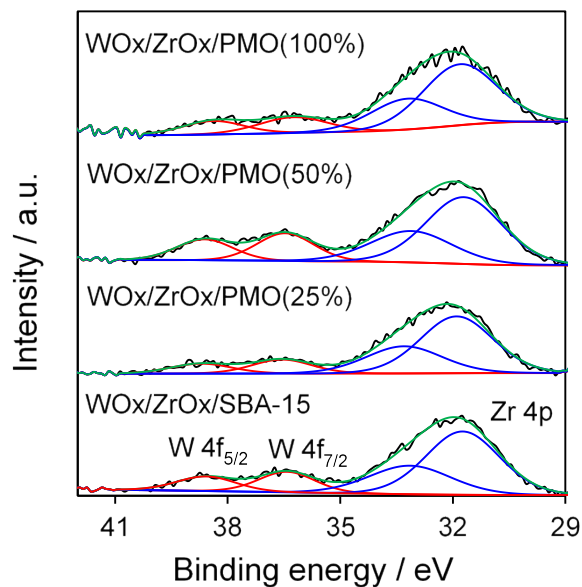

**Figure S13.** W 4f and Zr 4p XP spectra of WOx/ZrOx impregnated SBA-15 and PMOs.

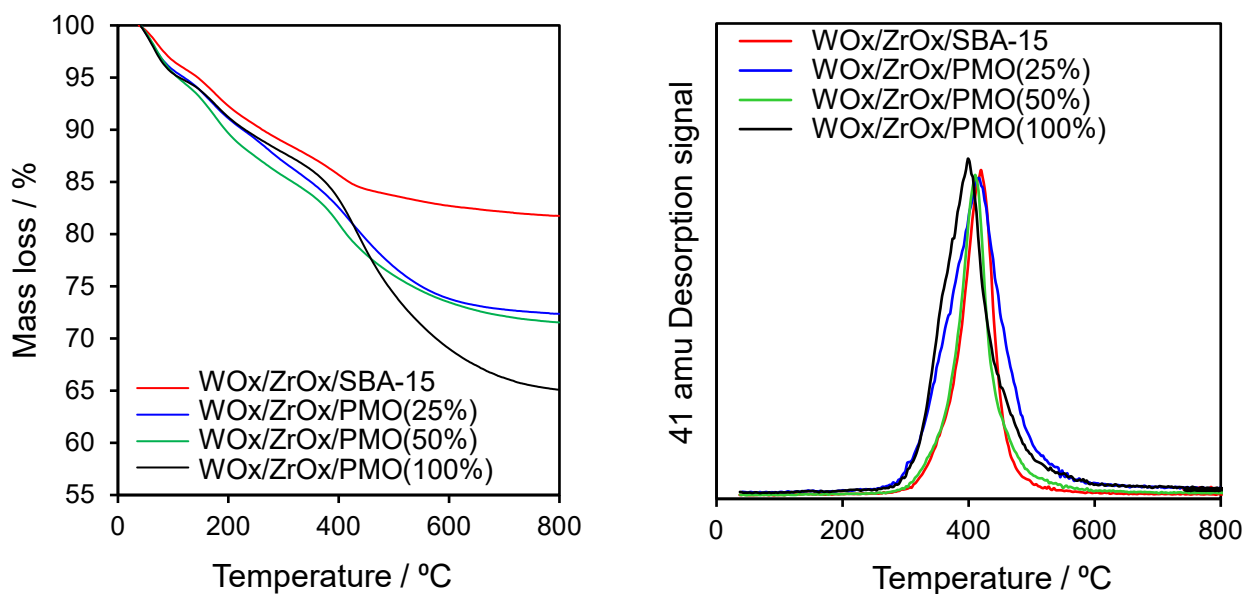

**Figure S14.** Thermogravimetric analysis of chemisorbed propylamine as a molecular probe of surface acidity for WOx/ZrOx impregnated SBA-15 and PMOs, (*left*) mass loss and (*right*) normalised  $m/z=41$  amu mass spectrometer desorption signal.

## Catalytic experiments

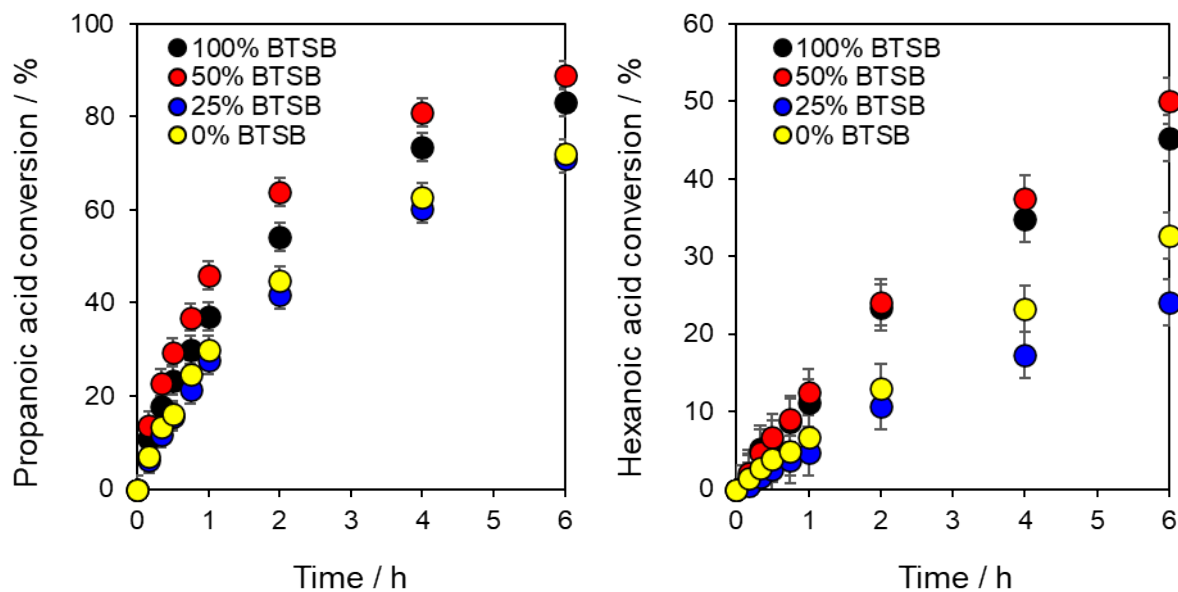

**Figure S15.** Reaction profiles for (*left*) propanoic acid and (*right*) hexanoic acid esterification with methanol over WO<sub>x</sub>/ZrO<sub>x</sub> impregnated SBA-15 and PMOs. Reaction conditions: 60 °C, 12.5 mL MeOH, 30:1 molar ratio MeOH: acid, 0.025 g catalyst, 800 rpm.

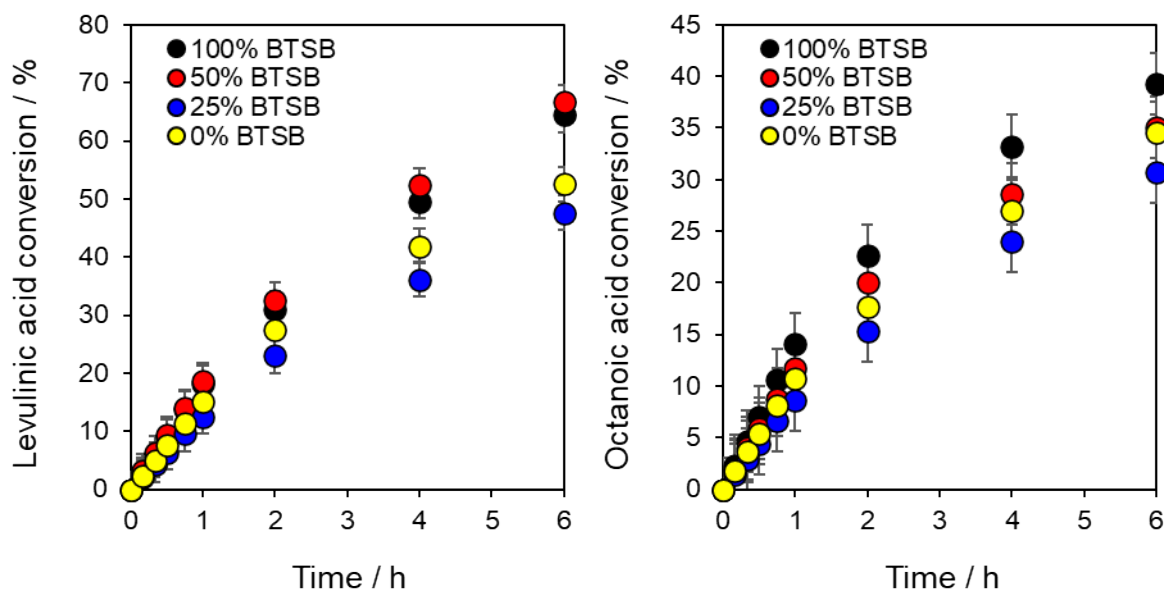

**Figure S16.** Reaction profiles for (*left*) levulinic acid and (*right*) octanoic acid esterification with methanol over WO<sub>x</sub>/ZrO<sub>x</sub> impregnated SBA-15 and PMOs. Reaction conditions: 60 °C, 12.5 mL MeOH, 30:1 molar ratio MeOH: acid, 0.025 g catalyst, 800 rpm.

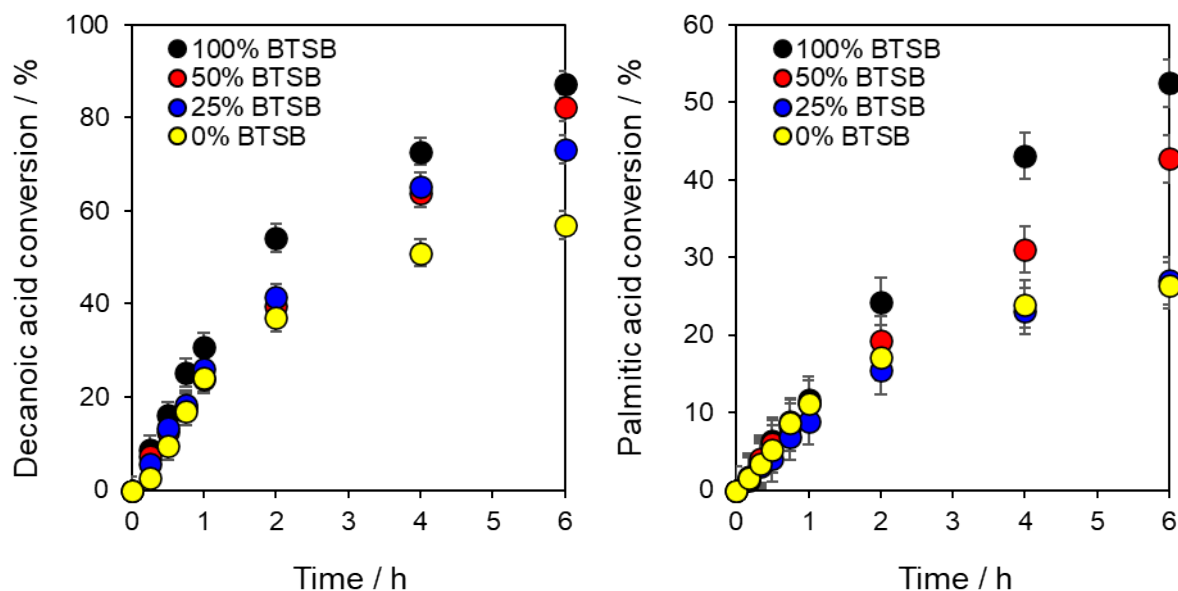

**Figure S17.** Reaction profiles for (*left*) decanoic acid and (*right*) palmitic acid esterification with methanol over  $\text{WO}_x/\text{ZrO}_x$  impregnated SBA-15 and PMOs. Reaction conditions: 60 °C, 12.5 mL MeOH, 30:1 molar ratio MeOH: acid, 0.050 g catalyst, 800 rpm.

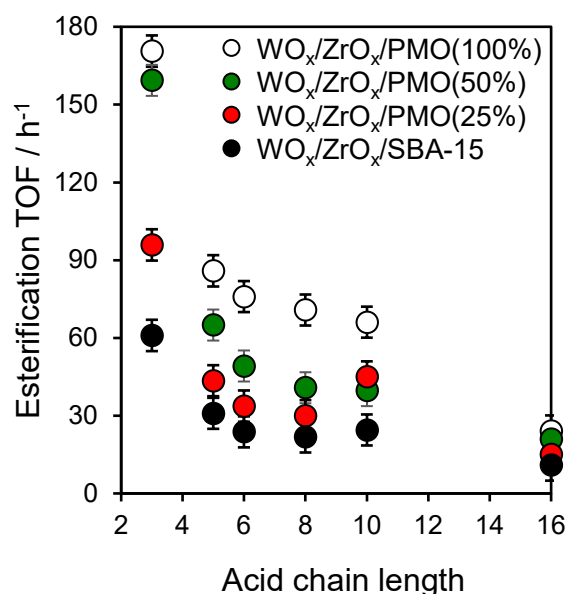

**Figure S18.** Turnover frequencies for  $\text{C}_3$ - $\text{C}_{16}$  acids with methanol over  $\text{WO}_x/\text{ZrO}_x$  impregnated SBA-15 and PMOs. Reaction conditions: 60 °C, 12.5 mL MeOH, 30:1 molar ratio MeOH: acid, 0.025 g ( $\text{C}_3$ - $\text{C}_8$  acids) and 0.050 g ( $\text{C}_{10}$ - $\text{C}_{16}$  acids) catalyst, 800 rpm.

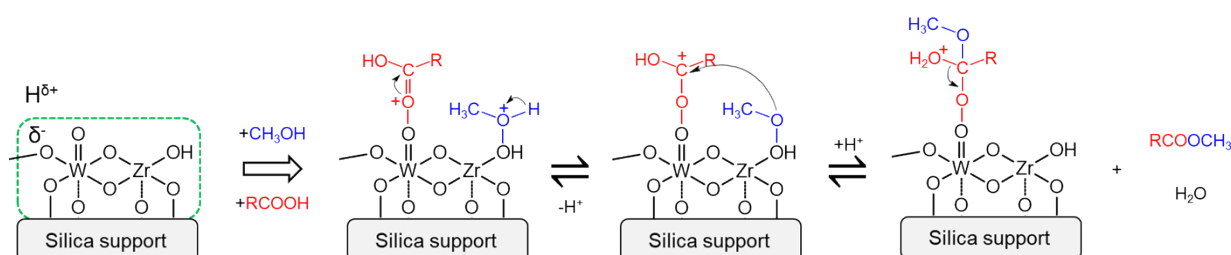

**Figure S19.** Proposed mechanism for carboxylic acid esterification over Lewis and Brønsted acid sites of a tungstated zirconia/silica catalyst. Adapted from ESI references 3 and 4.

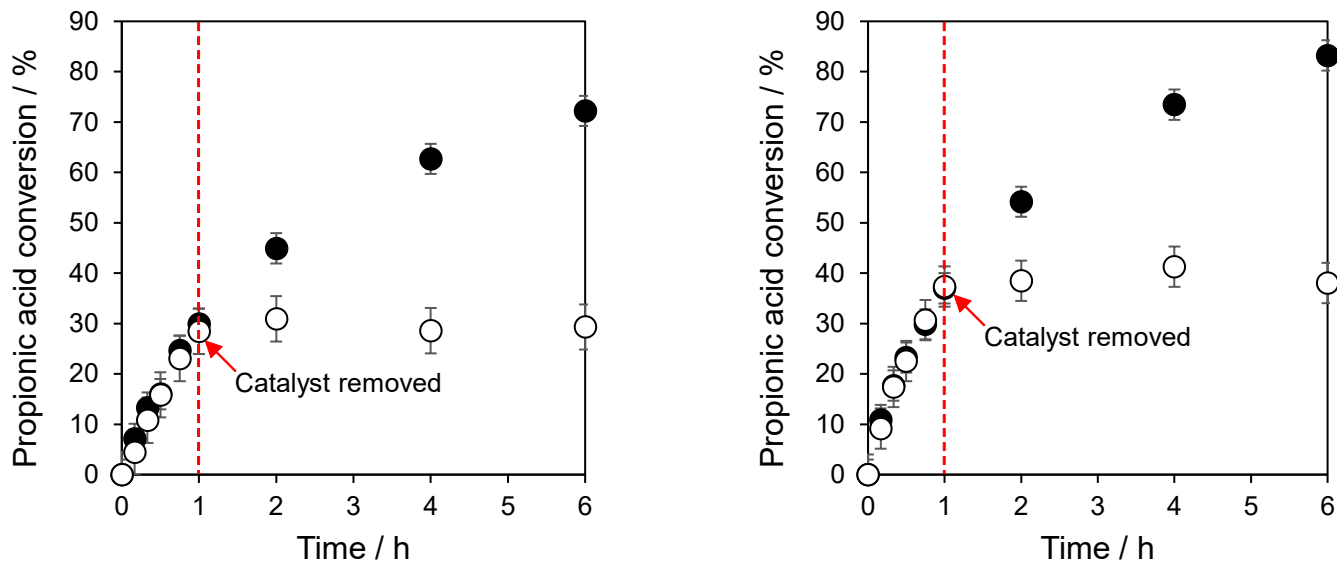

**Figure S20.** Hot filtration experiments for (*left*)  $\text{WO}_x/\text{ZrO}_2/\text{SBA-15}$  and (*right*)  $\text{WO}_x/\text{ZrO}_x/\text{PMO}(100\%)$  for propionic acid with methanol esterification. Red dashed line denotes catalyst removal after 1 h. Conditions: 60 °C, 12.5 mL MeOH, 30:1 molar ratio MeOH: acid, 0.025 g catalyst, 800 rpm.

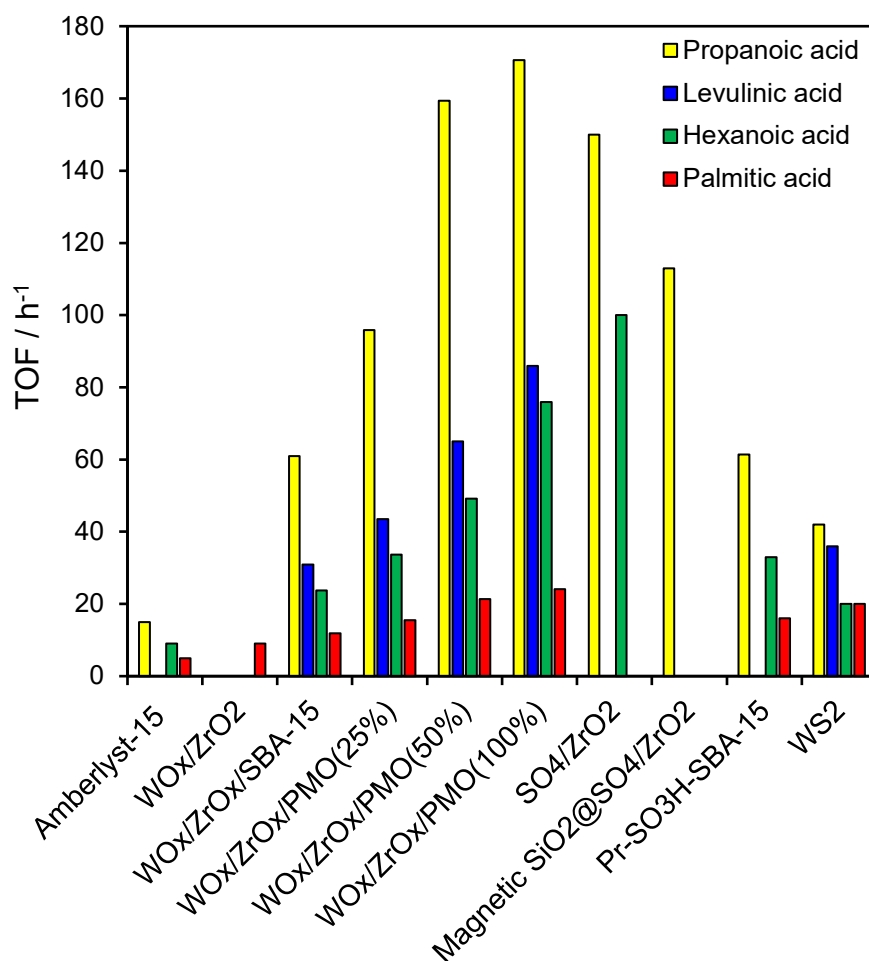

**Figure S21.** Solid acid catalyst performance in batchwise carboxylic acid esterification with methanol. Reaction conditions: 60 °C, 30:1 molar ratio MeOH: acid. **Catalysts:** Amberlyst-15 (this work);  $\text{WO}_x/\text{ZrO}_x/\text{SBA-15}$  (this work);  $\text{WO}_x/\text{ZrO}_x/\text{PMOs}$  (this work);  $\text{WO}_x/\text{ZrO}_2$ ;  $\text{SO}_4/\text{ZrO}_2$ ;  $\text{Magnetic SiO}_2@\text{SO}_4/\text{ZrO}_2$ ;  $\text{Pr-SO}_3\text{H}/\text{SBA-15}$ ;  $\text{WS}_2$ .

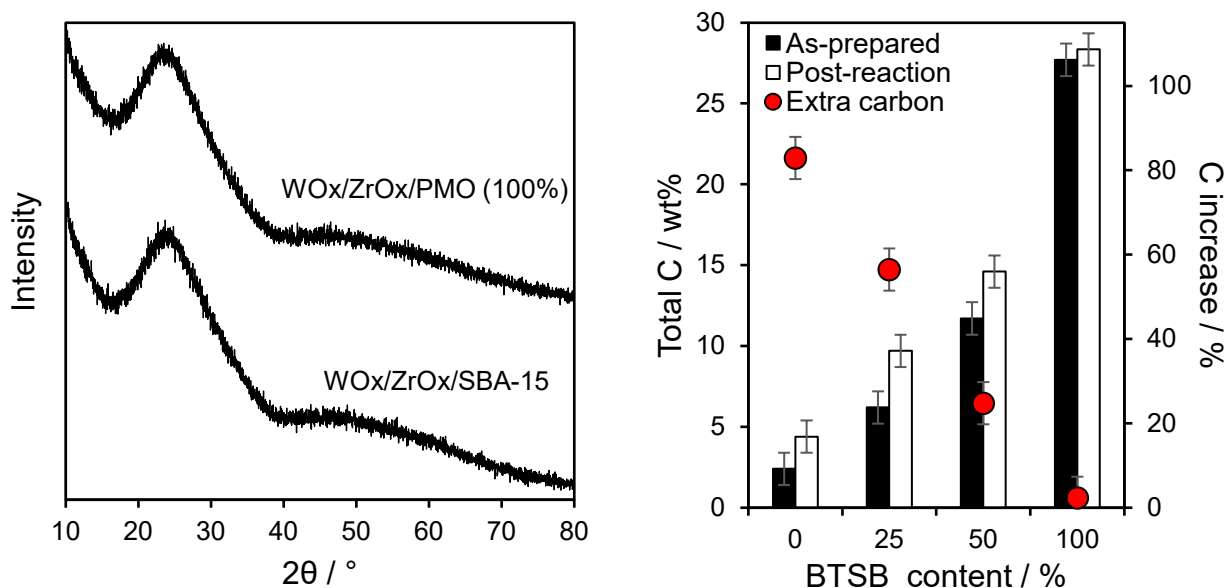

**Figure S22.** (left) Wide angle XRD patterns of  $\text{WO}_x/\text{ZrO}_x/\text{SBA-15}$  and  $\text{WO}_x/\text{ZrO}_x/\text{PMO}(100\%)$  after three propanoic acid with methanol esterification reaction cycles, and (right) CHN elemental analysis of as-prepared and post-reaction  $\text{WO}_x/\text{ZrO}_x/\text{SBA-15}$  and  $\text{WO}_x/\text{ZrO}_x/\text{PMOs}$ .

**Table S3.** Elemental analysis (XRF) of as-prepared and post-reaction catalysts.

| Catalyst                                                             | Zr / wt% | W / wt% | W:Zr mass ratio |
|----------------------------------------------------------------------|----------|---------|-----------------|
| $\text{WO}_x/\text{ZrO}_x/\text{SBA-15}$                             | 39.4     | 2.1     | 0.05            |
| After 3 reaction cycles $\text{WO}_x/\text{ZrO}_x/\text{SBA-15}$     | 37.9     | 2.1     | 0.06            |
| $\text{WO}_x/\text{ZrO}_x/\text{PMO}(100\%)$                         | 26.3     | 2.0     | 0.07            |
| After 3 reaction cycles $\text{WO}_x/\text{ZrO}_x/\text{PMO}(100\%)$ | 27.2     | 2.1     | 0.08            |

## References

- (1) Sánchez-Vázquez, R.; Pirez, C.; Iglesias, J.; Wilson, K.; Lee, A. F.; Melero, J. A. Zr-Containing Hybrid Organic–Inorganic Mesoporous Materials: Hydrophobic Acid Catalysts for Biodiesel Production. *ChemCatChem* **2013**, *5* (4), 994-1001. DOI: <https://doi.org/10.1002/cctc.201200527>.
- (2) Morales, G.; Osatiashtiani, A.; Hernández, B.; Iglesias, J.; Melero, J. A.; Paniagua, M.; Robert Brown, D.; Granollers, M.; Lee, A. F.; Wilson, K. Conformal sulfated zirconia monolayer catalysts for the one-pot synthesis of ethyl levulinate from glucose. *Chemical Communications* **2014**, *50* (79), 11742-11745, 10.1039/C4CC04594G. DOI: 10.1039/C4CC04594G.
- (3) dos Santos, V. C.; Wilson, K.; Lee, A. F.; Nakagaki, S. Physicochemical properties of  $\text{WO}_x/\text{ZrO}_2$  catalysts for palmitic acid esterification. *Applied Catalysis B: Environmental* **2015**, *162*, 75-84. DOI: <https://doi.org/10.1016/j.apcatb.2014.06.036>.
- (4) Osatiashtiani, A.; Durdell, L. J.; Manayil, J. C.; Lee, A. F.; Wilson, K. Influence of alkyl chain length on sulfated zirconia catalysed batch and continuous esterification of carboxylic acids by light alcohols. *Green Chemistry* **2016**, *18* (20), 5529-5535, 10.1039/C6GC01089J. DOI: 10.1039/C6GC01089J.
- (5) Tai, Z.; Isaacs, M. A.; Durdell, L. J.; Parlett, C. M. A.; Lee, A. F.; Wilson, K. Magnetically-separable  $\text{Fe}_3\text{O}_4@\text{SiO}_2@\text{SO}_4\text{-ZrO}_2$  core-shell nanoparticle catalysts for propanoic acid esterification. *Molecular Catalysis* **2018**, *449*, 137-141. DOI: <https://doi.org/10.1016/j.mcat.2018.02.021>.
- (6) Pirez, C.; Caderon, J.-M.; Dacquin, J.-P.; Lee, A. F.; Wilson, K. Tunable KIT-6 Mesoporous Sulfonic Acid Catalysts for Fatty Acid Esterification. *ACS Catalysis* **2012**, *2* (8), 1607-1614. DOI: 10.1021/cs300161a.
- (7) dos Santos, V. C.; Durdell, L. J.; Isaacs, M. A.; Parlett, C. M. A.; Wilson, K.; Lee, A. F. A new application for transition metal chalcogenides:  $\text{WS}_2$  catalysed esterification of carboxylic acids. *Catalysis Communications* **2017**, *91*, 16-20. DOI: <https://doi.org/10.1016/j.catcom.2016.12.003>.
